# Supplementary material
Source: PubMed Central journal article supplement (PMC3123112)
Supplement: supp_M110.212340_jbc.M110.212340-1.pdf [file supp_M110.212340_jbc.M110.212340-1.pdf]

# **LIPIDS TRIGGER A CONFORMATIONAL SWITCH REGULATING SRP-MEDIATED PROTEIN TARGETING**

**Goran Stjepanovic<sup>1</sup>, Katja Kapp<sup>2,3</sup>, Gert Bange<sup>1</sup>, Christian Graf<sup>2,4</sup>, Robert Lindner<sup>1</sup>, Richard Parlitz<sup>1</sup>, Klemens Wild<sup>1</sup>, Matthias P. Mayer<sup>2</sup>, Irmgard Sinning<sup>1,5</sup>**

From the <sup>1</sup>Biochemistry Center (BZH), University of Heidelberg, INF 328, 69120, Heidelberg, Germany and the <sup>2</sup>Zentrum für Molekularbiologie (ZMBH), University of Heidelberg, INF 328, 69120 Heidelberg, Germany

<sup>1</sup> Biochemistry Center (BZH), University of Heidelberg, INF 328, 69120, Heidelberg, Germany

<sup>2</sup> Zentrum für Molekularbiologie (ZMBH), University of Heidelberg, INF 328, 69120 Heidelberg, Germany

<sup>3</sup> Present address: MPI of Molecular Cell Biology and Genetics, Pfotenhauerstrasse 108, 01307 Dresden, Germany

<sup>4</sup> Present address: Novartis Pharma AG, 4002 Basel, Switzerland

<sup>5</sup> Corresponding author: irmi.sinning@bzh.uni-heidelberg.de;

++49-6221-544781 (phone)

++49-6221-544790 (fax)

**Supplemental Figures S1, S2 and S3**

**Supplemental Table S1**

A

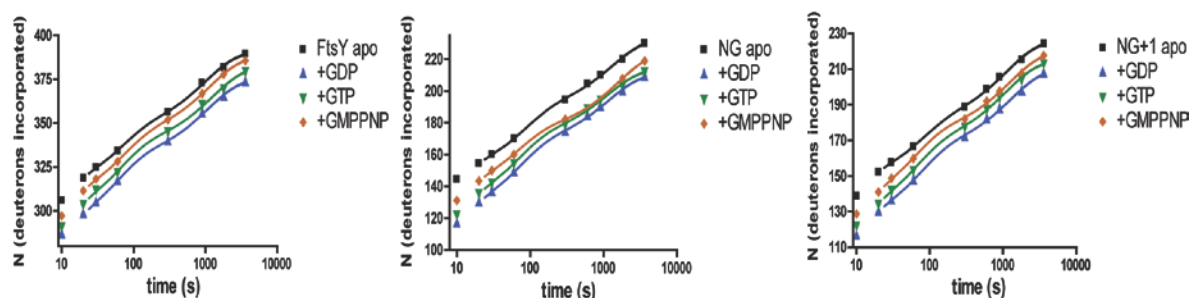

B

|                |        | N         | A         | $k_A (10^3 s^{-1})$ | $t_{1/2_A} (s)$ | B        | $k_B (10^3 s^{-1})$ | $t_{1/2_B} (s)$ | C        | $k_C (10^3 s^{-1})$ | $t_{1/2_C} (min)$ |
|----------------|--------|-----------|-----------|---------------------|-----------------|----------|---------------------|-----------------|----------|---------------------|-------------------|
| FtsY           | apo    | 386.3±1.2 | 301.7±1.7 | 413.8±23.4          | 1.7             | 46±1.7   | 16.1±1.3            | 43.0            | 38.6±1.1 | 0.8±0.1             | 15.1              |
|                | GDP    | 377.5±2.5 | 281.6±4   | 394.6±46.7          | 1.8             | 47.5±4   | 19.4±3.2            | 35.7            | 48.4±2.3 | 0.7±0.1             | 15.6              |
|                | GTP    | 384.7±2   | 286.5±3.4 | 405.2±43.4          | 1.7             | 51.1±3.4 | 18.6±2.5            | 37.3            | 47.1±2   | 0.8±0.1             | 14.4              |
|                | GMPPNP | 383.8±0.5 | 297.9±1   | 358.3±8.2           | 1.9             | 46.5±1.1 | 17±0.8              | 40.8            | 39.4±0.7 | 0.9±0.0             | 12.6              |
|                |        | N         | A         | $k_A (10^3 s^{-1})$ | $t_{1/2_A} (s)$ | B        | $k_B (10^3 s^{-1})$ | $t_{1/2_B} (s)$ | C        | $k_C (10^3 s^{-1})$ | $t_{1/2_C} (min)$ |
| NG (197-497)   | apo    | 232.5±2   | 144.5±2.8 | 322.8±33.5          | 2.1             | 42.1±2.9 | 13.5±2.2            | 51.3            | 46±2     | 0.8±0.1             | 15.1              |
|                | GDP    | 210.6±1.5 | 116.9±2.8 | 271.4±23.7          | 2.6             | 48.4±2.9 | 15.9±2              | 43.6            | 45.3±1.8 | 0.9±0.1             | 13.4              |
|                | GTP    | 213.5±1.8 | 122.1±3.6 | 278±30.9            | 2.5             | 47.9±3.7 | 16.5±2.6            | 41.9            | 43.6±2.3 | 0.9±0.1             | 13.1              |
|                | GMPPNP | 224.3±2.8 | 131.6±3   | 287.5±25.7          | 2.4             | 42.3±2.9 | 16.8±2.4            | 41.4            | 50.4±2.3 | 0.6±0.1             | 18.6              |
|                |        | N         | A         | $k_A (10^3 s^{-1})$ | $t_{1/2_A} (s)$ | B        | $k_B (10^3 s^{-1})$ | $t_{1/2_B} (s)$ | C        | $k_C (10^3 s^{-1})$ | $t_{1/2_C} (min)$ |
| NG+1 (196-497) | apo    | 225.7±1.4 | 143.3±2.7 | 267.7±18            | 2.6             | 35.3±2.8 | 14.9±2.6            | 46.6            | 47.2±1.9 | 0.9±0.1             | 12.8              |
|                | GDP    | 210±2     | 118.4±3.3 | 261.8±25.3          | 2.6             | 45.3±3.4 | 15.2±2.4            | 45.5            | 46.2±2.1 | 0.8±0.1             | 14.7              |
|                | GTP    | 214.5±1.7 | 120.9±3.6 | 288.8±34            | 2.4             | 46±3.7   | 17.7±2.8            | 39.2            | 47.5±2.2 | 0.9±0.1             | 12.6              |
|                | GMPPNP | 219.7±2.3 | 127±4.3   | 298±41.3            | 2.3             | 46±4.3   | 18.7±3.3            | 37.1            | 46.7±2.4 | 0.8±0.1             | 14.3              |

$$y = N - (Ae^{-k_A t}) - (Be^{-k_B t}) - (Ce^{-k_C t})$$

**Supplemental Figure S1** HX-MS analysis of the dynamic properties and nucleotide dependent conformation changes in FtsY. (A) The HX global kinetics of FtsY, NG and NG+1 show the nucleotide dependence of the numbers of deuterons incorporated over time. The solid lines and observed rate constants shown in (B) are derived from a nonlinear triple-exponential regression fit of the deuterons incorporated over time. Global exchange data were adjusted for deuteron loss during analysis.

A

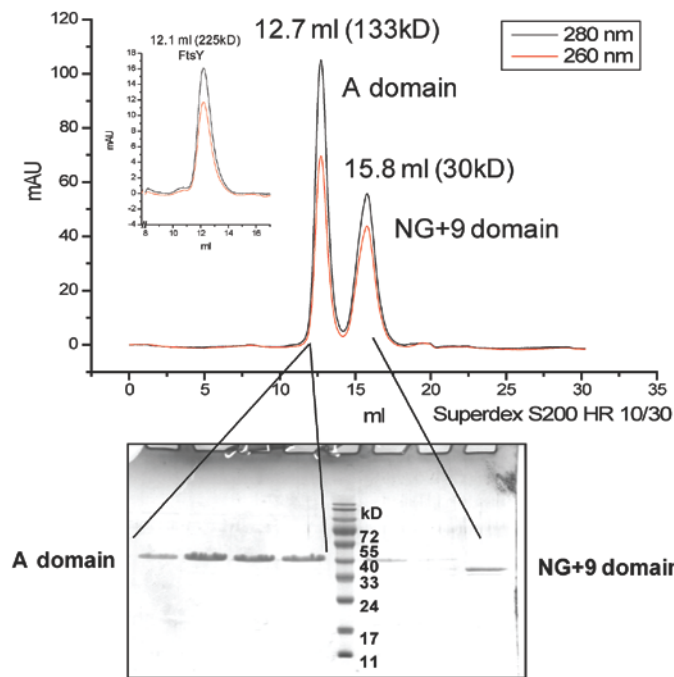

B

| Construct | Aberrant MW | Absolute MW | Calculated MW |
|-----------|-------------|-------------|---------------|
| FtsY-Xa   | 225         | 56.7        | 55            |
| A domain  | 130         | 20.8        | 21            |
| NG+9      | 30          | 26.6        | 35            |

C

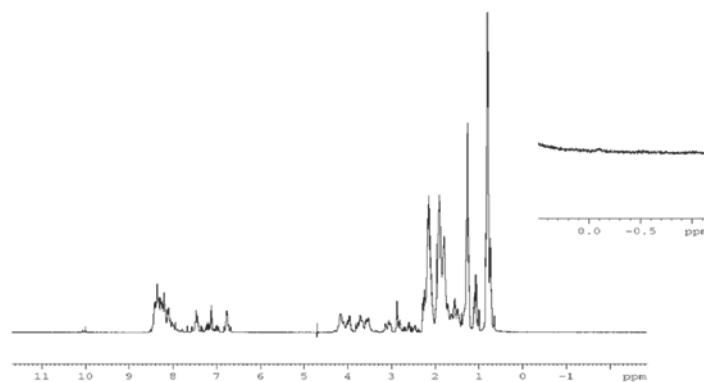

**Supplemental Figure S2** Characterization of a proteolytically cleavable FtsY variant (FtsY-Xa). (A) FtsY-Xa was cleaved after purification and the fragments (A and NG+9 domains) analysed by size exclusion chromatography and SDS-PAGE. The A domain does not stably interact with the NG+9 domain. The unusually aberrant migration behavior of FtsY and the A domain indicates an elongated shape which is characteristic of unstructured proteins. (B) Hydrodynamic properties of FtsY, A and NG+9 domains. The aberrant molecular weight (MW) was determined by size-exclusion chromatography, the absolute MW by static light scattering and refractive index measurements. The MW is given in kDa. In size exclusion chromatography FtsY or the A domain migrate with aberrant

molecular weights. (C) One-dimensional  $^1\text{H}$  NMR spectrum of the A domain. Details of the signals upfield of 0.5 p.p.m. are given in the inset. The one-dimensional  $^1\text{H}$  NMR spectrum did not show any significant chemical shift dispersions indicating that the A domain is intrinsically disordered.

A

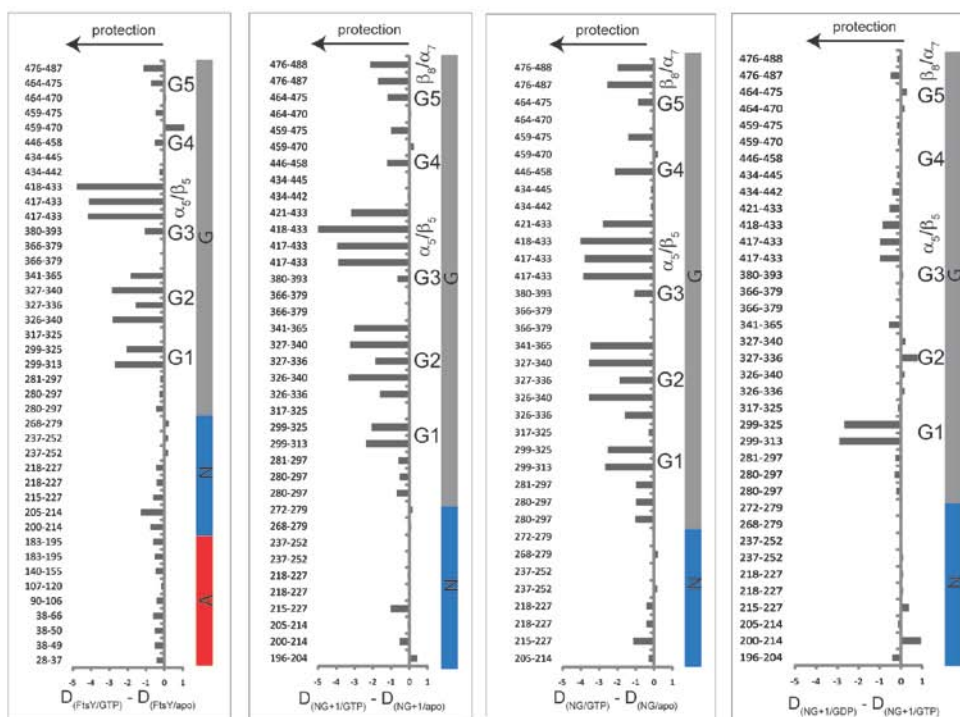

B

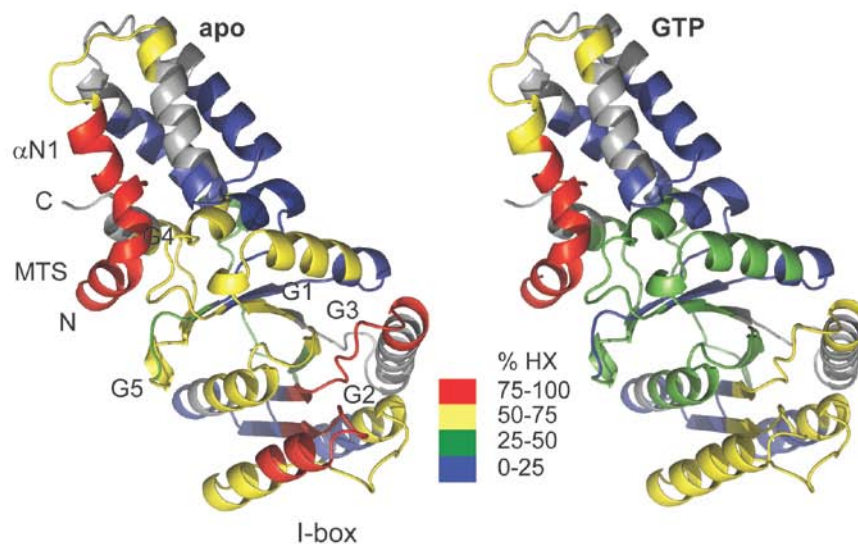

**Supplemental Figure S3** HX-MS analysis of nucleotide dependent structural changes in FtsY. (A) Difference plots of deuteron incorporation into FtsY, NG or NG+1 in the presence of GTP minus deuterons incorporated in the absence of nucleotides (apo) after 10 s of incubation in  $\text{D}_2\text{O}$ . The

numbers corresponding to the protein segments are indicated on the left and domain structure of FtsY on the right. In the difference plot, bars to the left indicate nucleotide induced protection (less deuterium incorporation). The right panel gives the difference plot of deuterium incorporation into NG+1 in the presence of GDP minus deuterons incorporated in the presence of GTP. **(B)** Localization of fast and slow exchanging regions in the NG+1 variant (mapped on the crystal structure of NG+1 shown in ribbon representation). Segments corresponding to peptic fragments are colored according to the relative deuterium incorporation into the nucleotide-free protein after 10 s in D<sub>2</sub>O.

**Supplemental Table S1** Data collection and refinement statistics.

|                                                     | FtsY                             |
|-----------------------------------------------------|----------------------------------|
| <b>Data collection</b>                              |                                  |
| Space group                                         | P2 <sub>1</sub> 2 <sub>1</sub> 2 |
| Cell dimensions                                     |                                  |
| <i>a</i> , <i>b</i> , <i>c</i> (Å)                  | 79.36, 108.41, 31.90             |
| $\alpha$ , $\beta$ , $\gamma$ (°)                   | 90.00, 90.00, 90.00              |
| Resolution (Å)                                      | 39.68-1.60                       |
| <i>R</i> <sub>merge</sub>                           | 0.102(0.59)*                     |
| <i>I</i> / $\sigma$ <i>I</i>                        | 12.8(2.7)                        |
| Completeness (%)                                    | 99.4(98.8)                       |
| Redundancy                                          | 6.1(5.9)                         |
| <b>Refinement</b>                                   |                                  |
| Resolution (Å)                                      | 39.679-1.6                       |
| No. reflections                                     | 36676                            |
| <i>R</i> <sub>work</sub> / <i>R</i> <sub>free</sub> | 17.82/21.98                      |
| No. atoms                                           |                                  |
| Protein                                             | 2422                             |
| Ligand/ion                                          | 20                               |
| Water                                               | 214                              |
| <i>B</i> -factors                                   |                                  |
| Protein                                             | 16.575                           |
| Ligand/ion                                          | 23.141                           |
| Water                                               | 27.997                           |
| R.m.s. deviations                                   |                                  |
| Bond lengths (Å)                                    | 0.006                            |
| Bond angles (°)                                     | 1.006                            |

\* Values in parentheses are for the highest resolution shell.
